# Supplementary material for: Heterogeneity of Tick Abundance and Infection with Zoonotic Pathogenic Bacteria in a Belgian Peri-Urban Forest
Source: Research Square preprint supplement (doi:10.21203/rs.3.rs-1408033/v1), 2022-03-07
Supplement: Supplementary file 1 [file fda389a036484c508886ae27.docx]

**ADDITIONAL FILE 1 - Short descriptions and pictures of the seven sampling units (SU) from the Bois de Lauzelle in 2016.**

**Heterogeneity of tick abundance and infection with zoonotic pathogenic bacteria in a Belgian peri-urban forest.**

**Raphaël Rousseau1*, Marcella Mori2, Benoît Kabamba3, Sophie O. Vanwambeke1**

**1** Georges Lemaitre Centre for Earth and Climate Research, Earth and Life Institute, UCLouvain, Place Pasteur, Louvain-la-Neuve, Belgium.

**2** Sciensano, Veterinary bacteriology, Groeselenberg 99, Ukkel/Uccle, Belgium.

**3** Pôle de Microbiologie Médicale, Institute of Clinical and Experimental Research (IREC), UCLouvain, Brussels, Belgium.


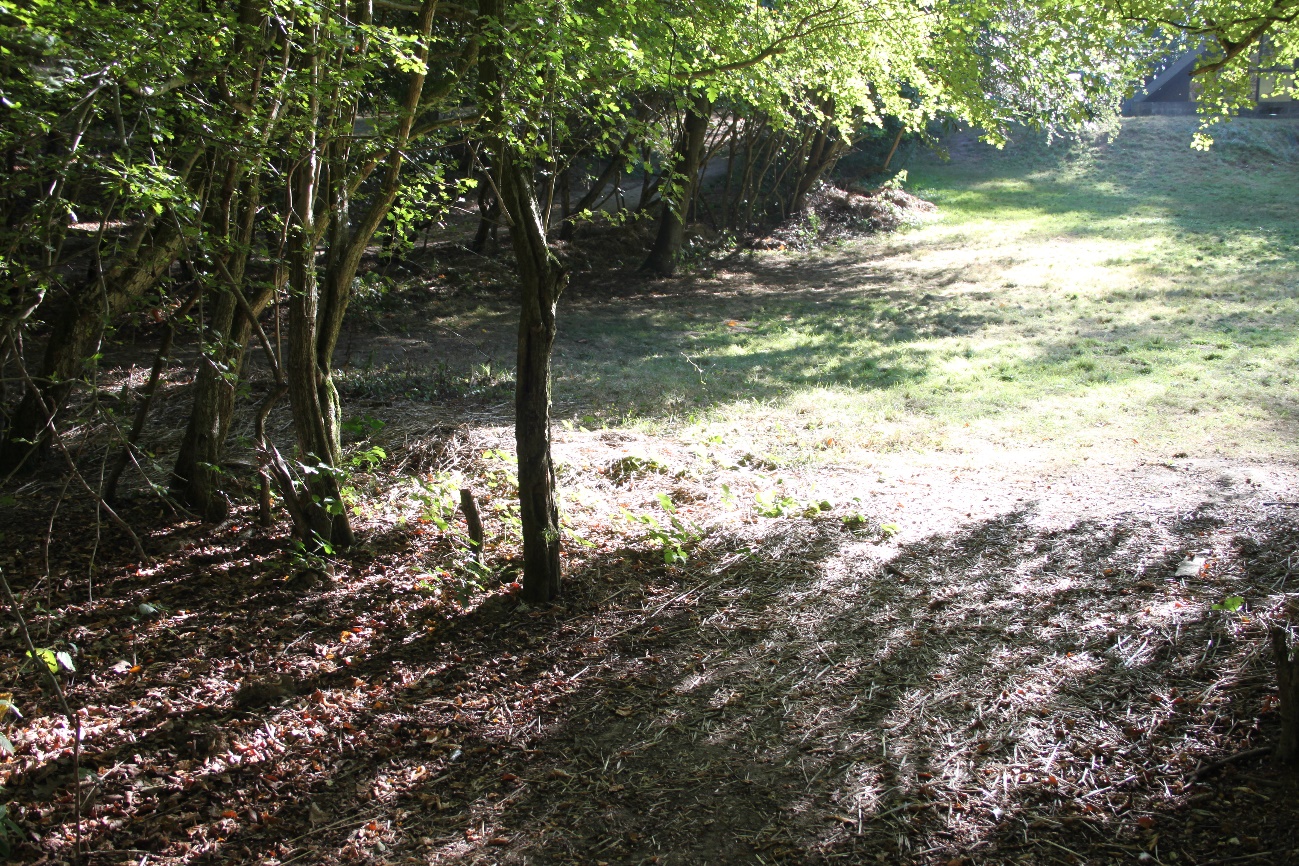


**Figure S1**: Picture of SU1. It was at an entrance of the forest, close to a cub scout’s meeting place. The transect was located on a loamy soil covered by grass and dead leaves. Credits: Elliott Wolter (2016).


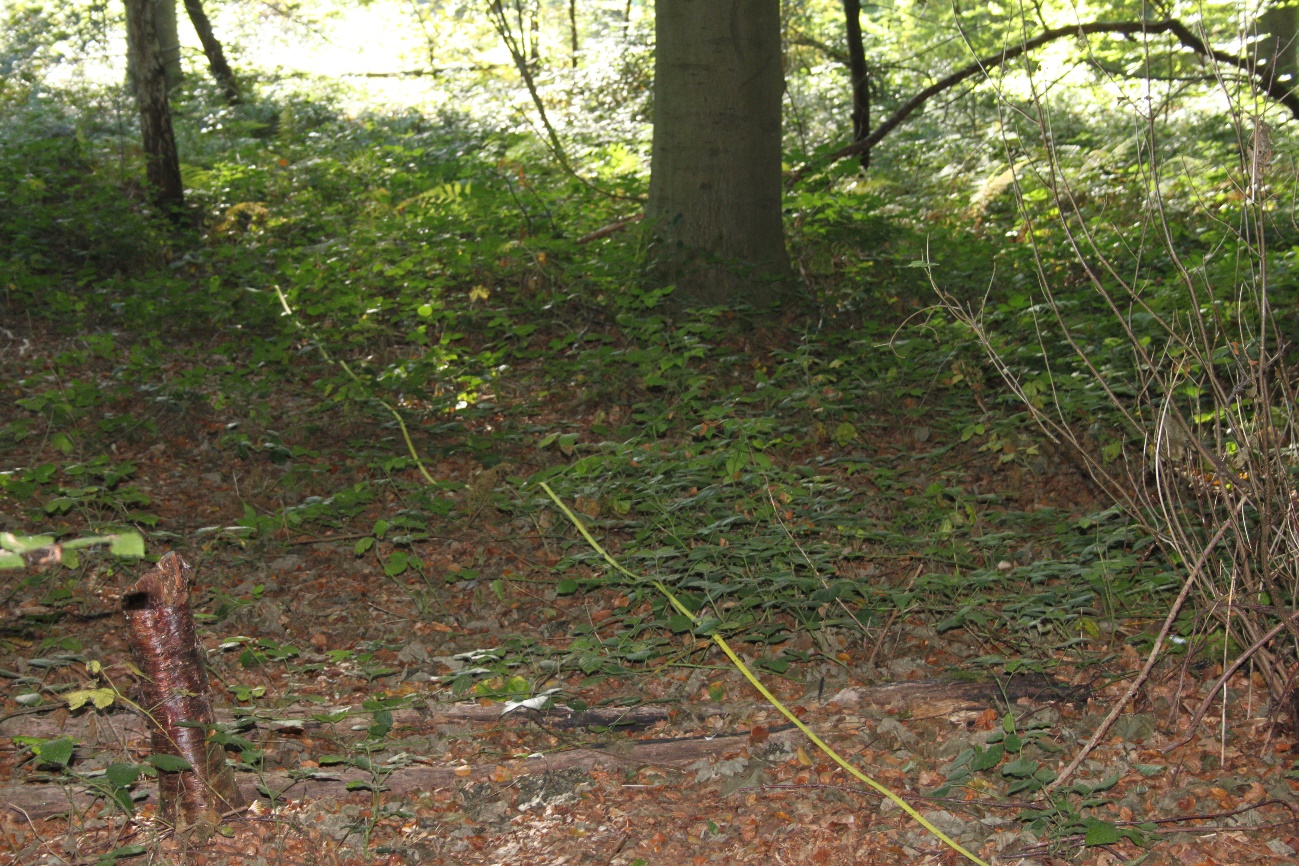


**Figure S2** : Picture of SU2. It was deeper in the forest, away from the trails on dense undergrowth of brambles, ferns, and dead leaves. Credits: Elliott Wolter (2016).


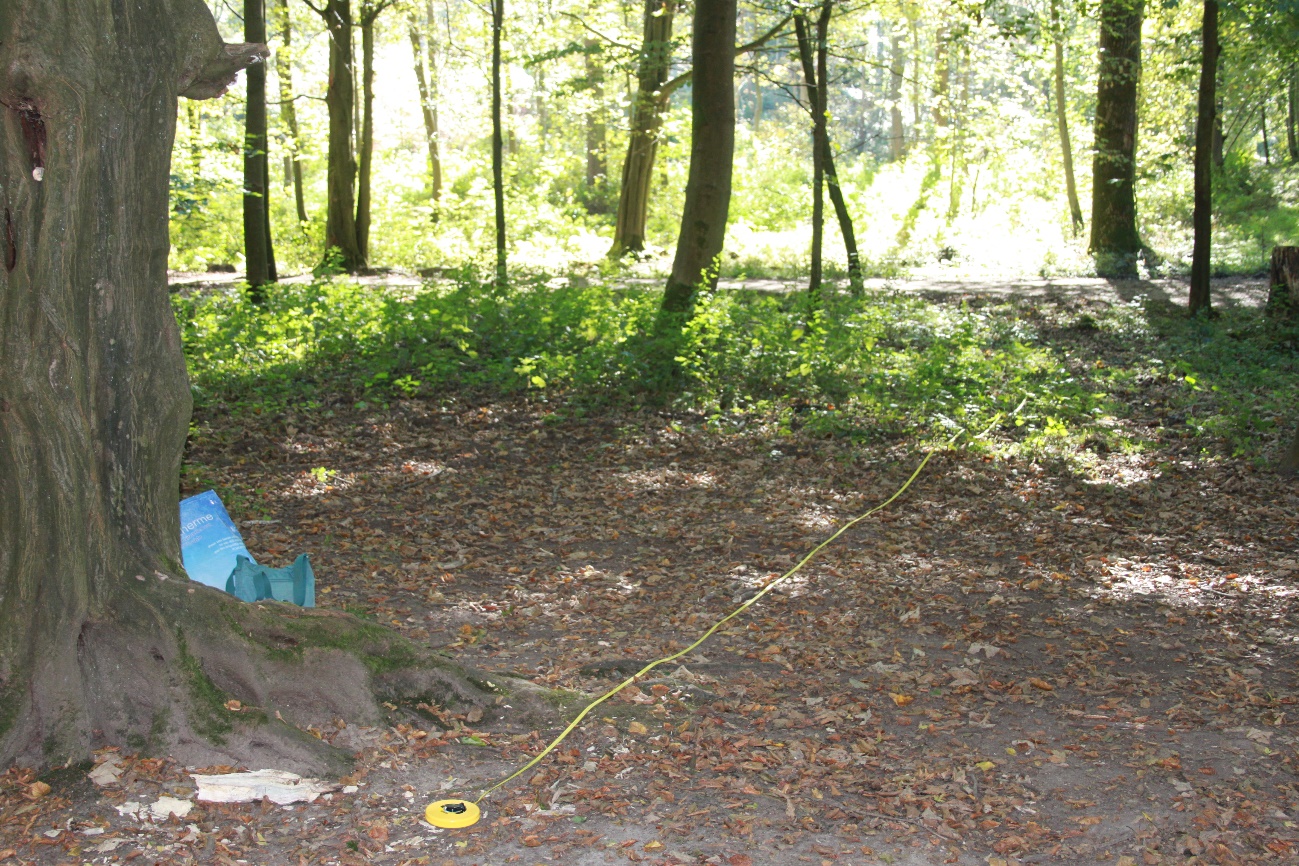


**Figure S3** : Picture of SU3. It was at the junction of two trails, close to a bench and an information panel. The undergrowth was not high or abundant. Credits: Elliott Wolter (2016).


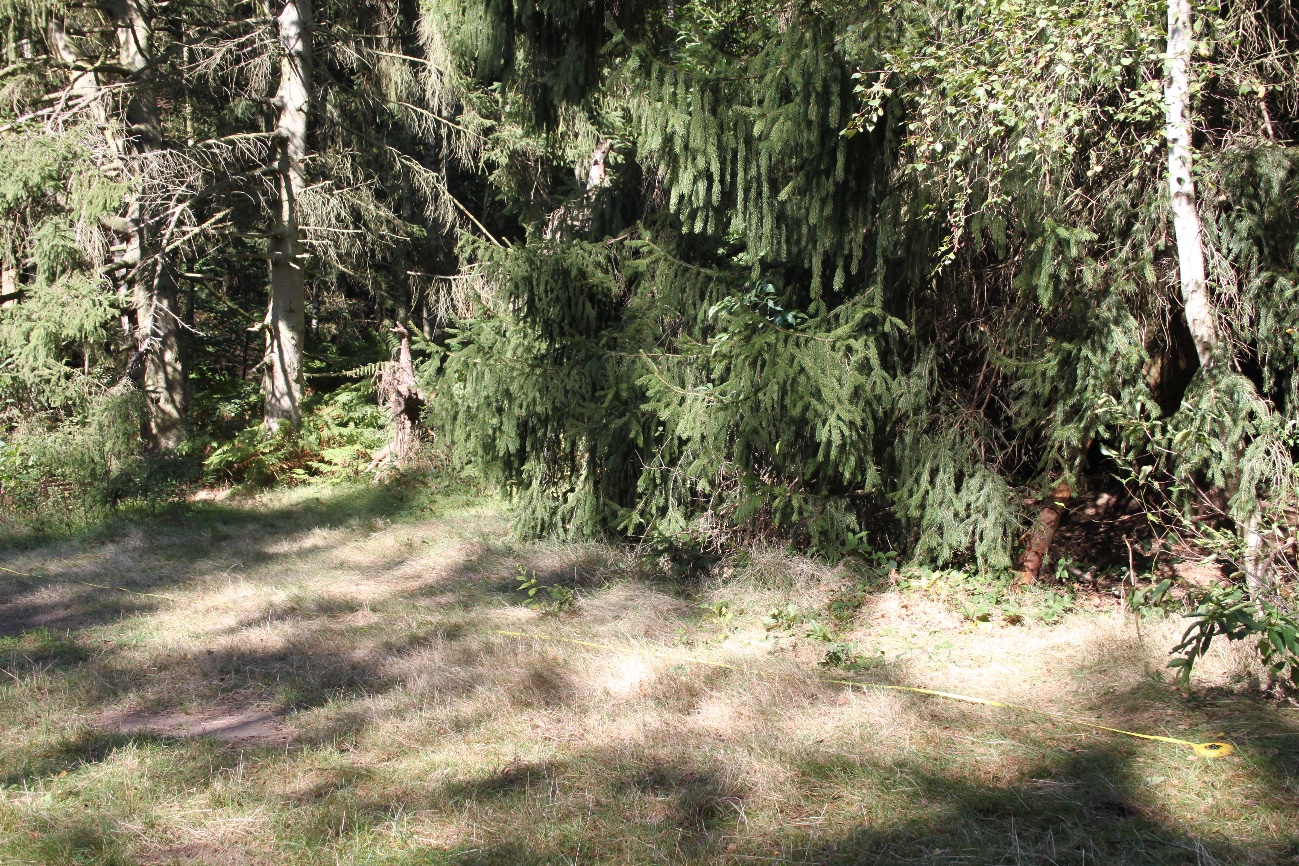


**Figure S4** : Picture of SU4. It was at the edge of a small clearing, composed by middle-height grass. Credits: Elliott Wolter (2016).


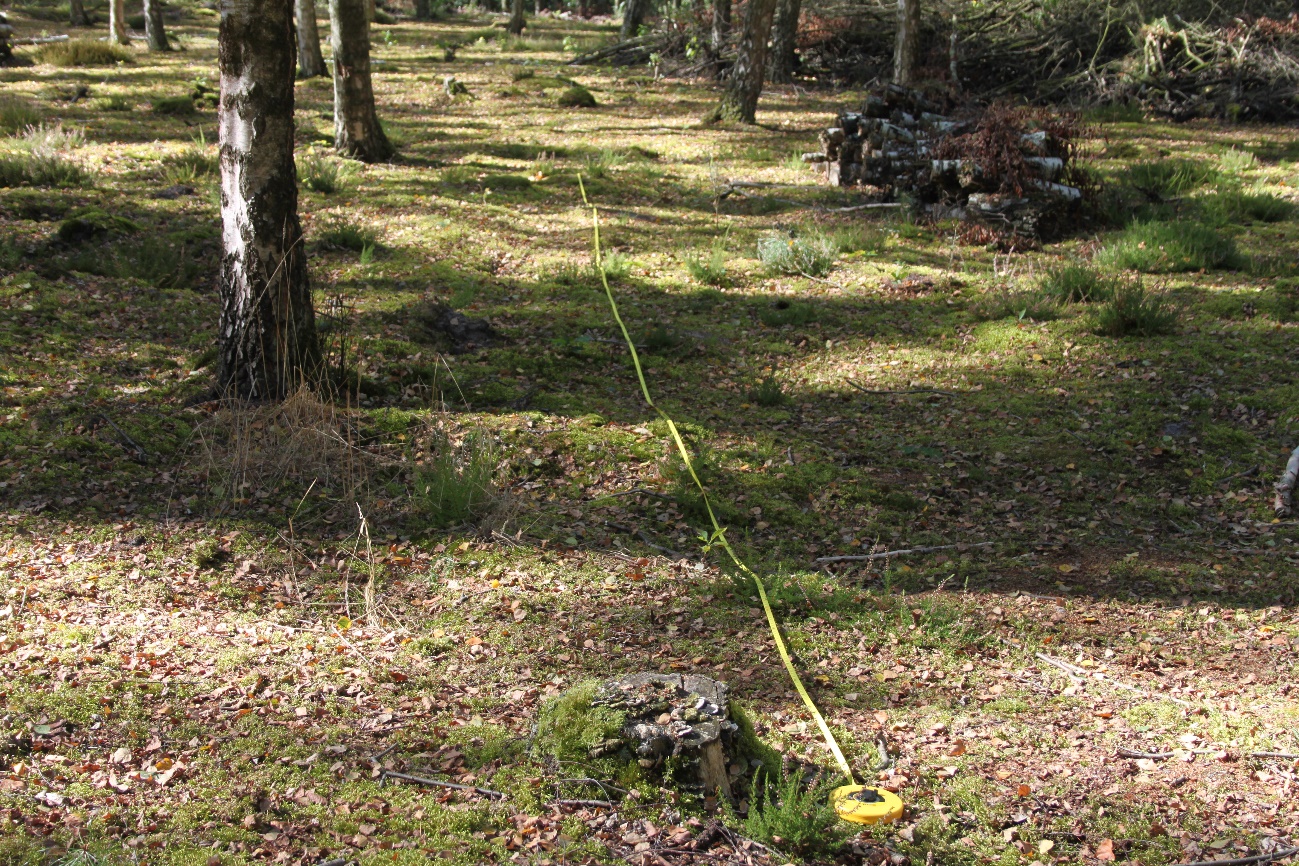


**Figure S5** : Picture of SU5. It was in an area where trees had recently been cut. The undergrowth was poor, mainly composed by a small layer of moss. Credits: Elliott Wolter (2016).


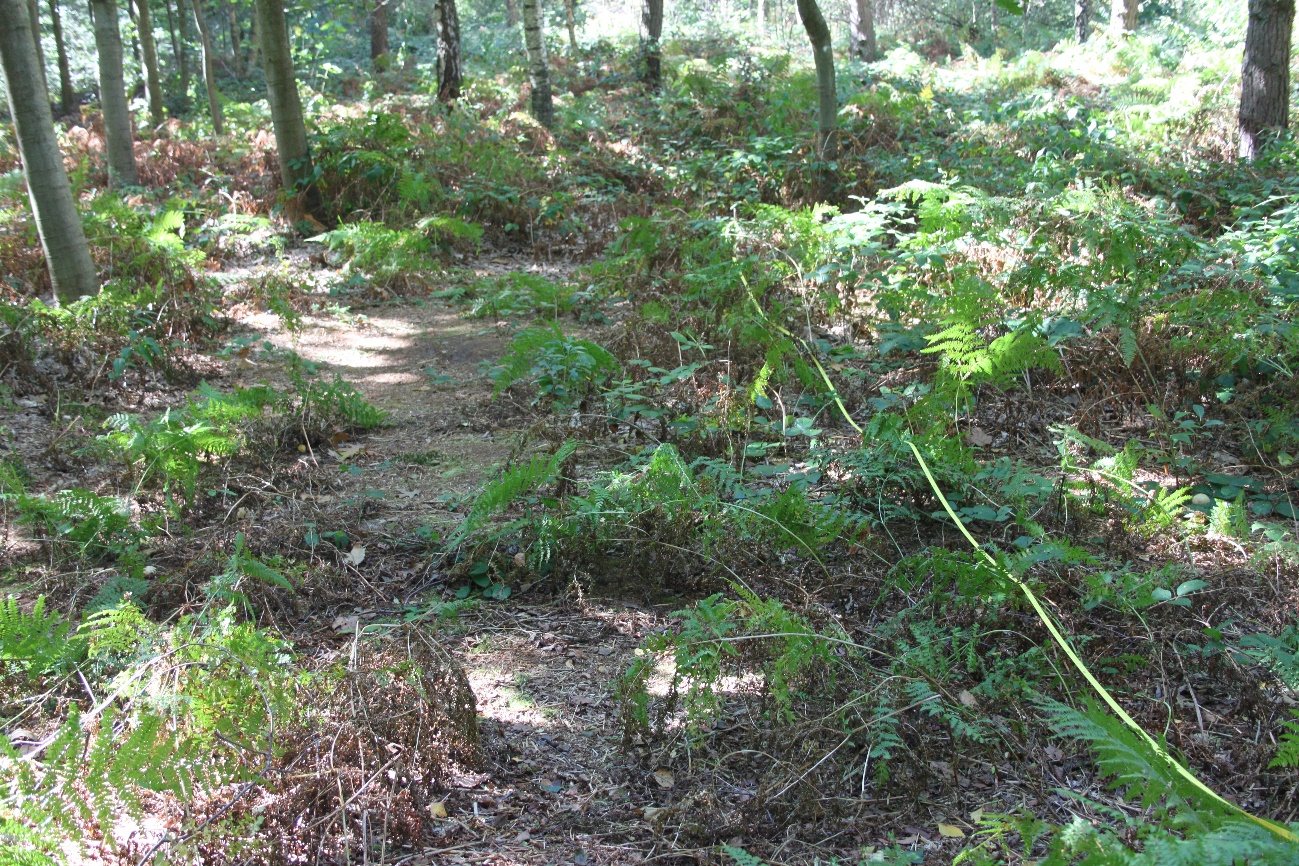


**Figure S6** : Picture of SU6. It was close to a barbecue facility, but away from the trails, with a dense undergrowth composed of brambles and ferns, and dead leaves. Credits: Elliott Wolter (2016).


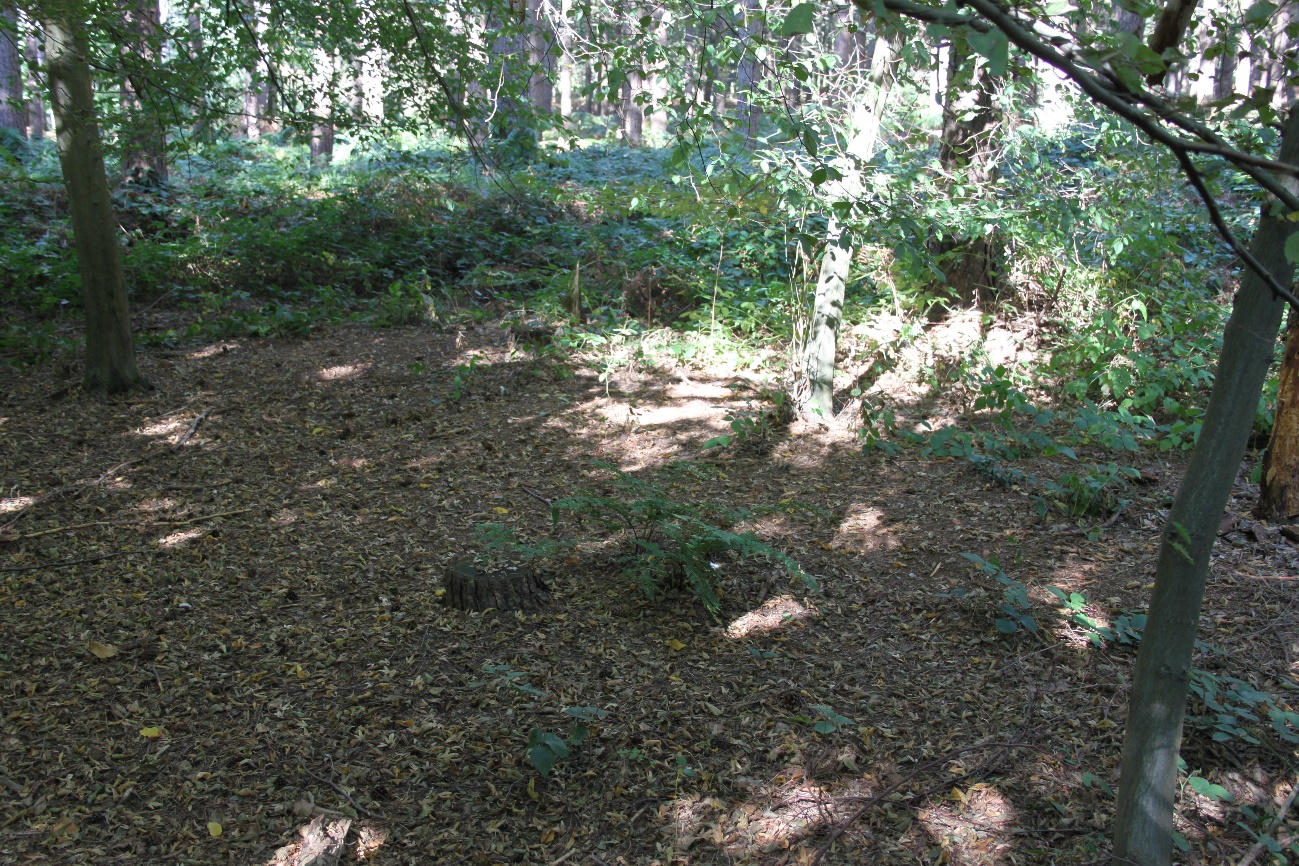


**Figure S7** : Picture of SU7. It was at the edge between coniferous and deciduous tree stands, away from the trails and with a dense undergrowth. Credits: Elliott Wolter (2016).
